# Supplementary material for: miRNA miR-21 Is Largely Dispensable for Intrathymic T-Cell Development
Source: PubMed Central journal article supplement (PMC6230590; doi:10.3389/fimmu.2018.02497), 2018-11-05
Supplement: Data_Sheet_1.pdf [file Data_Sheet_1.pdf]

# Figure S1

A

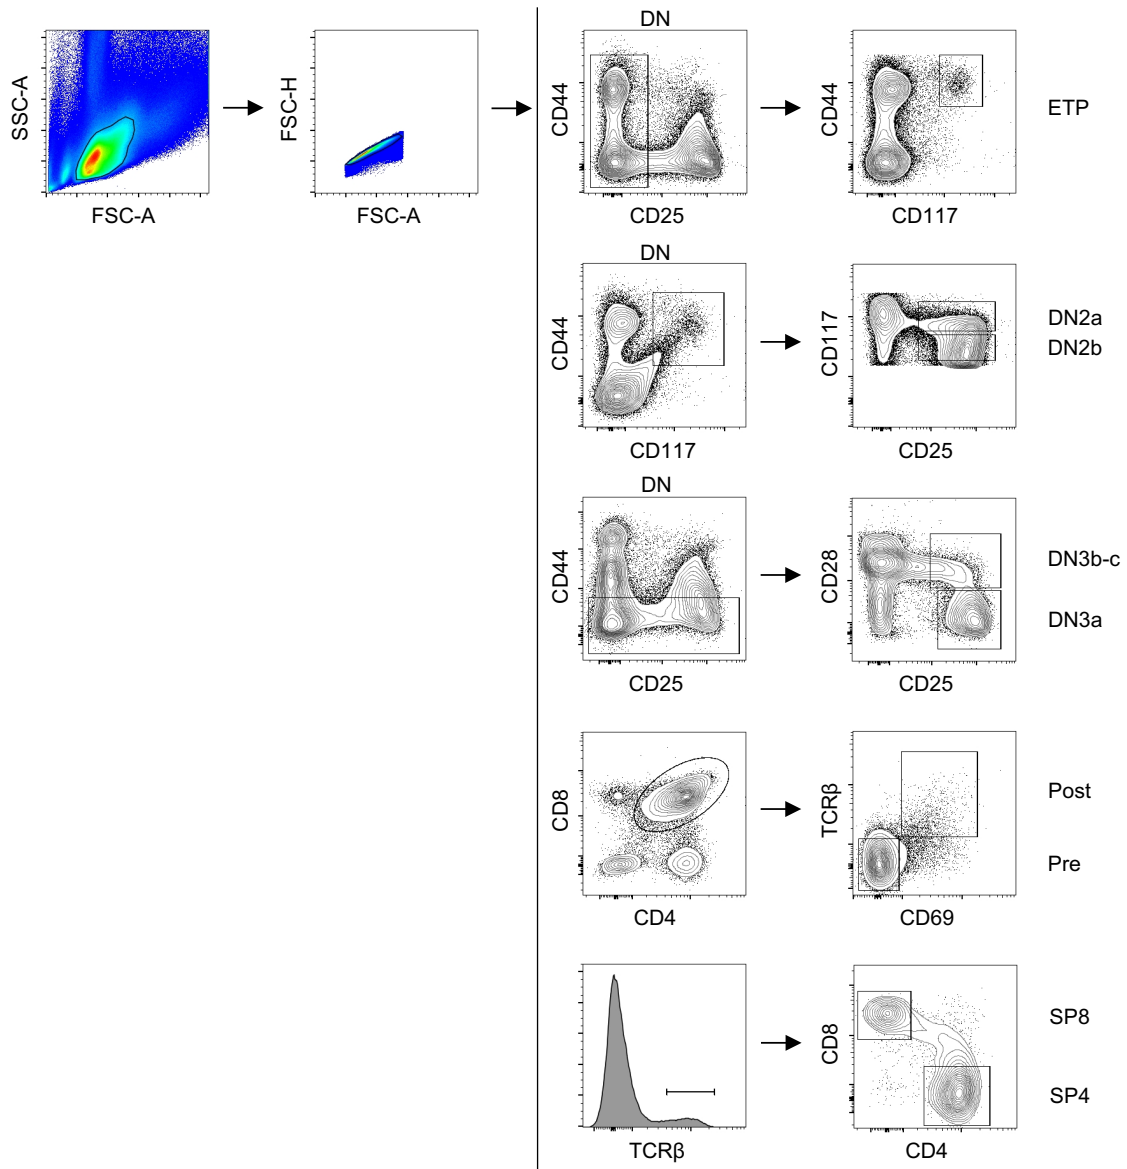

**Figure S1. Gating strategy to identify T-cell subsets.** A) Representative flow cytometric analysis to identify T-cell subsets of WT mice stained with antibodies against CD25, CD44, CD117, CD4, CD8, CD69, TCRβ. Subsets were defined as: ETPs (CD117<sup>hi</sup>CD25<sup>-</sup>CD44<sup>+</sup>), DN2a (CD117<sup>hi</sup>CD25<sup>+</sup>CD44<sup>+</sup>), DN2b (CD117<sup>lo</sup>CD25<sup>+</sup>CD44<sup>+</sup>), DN3a (CD25<sup>+</sup>CD44<sup>-</sup>CD28<sup>-</sup>) and DN3b-c (CD25<sup>+</sup>CD44<sup>-</sup>CD28<sup>+</sup>), pre-selection DP (CD4<sup>+</sup>CD8<sup>+</sup>CD69<sup>-</sup>TCRβ<sup>-</sup>), post-selection DP (CD4<sup>+</sup>CD8<sup>+</sup>CD69<sup>+</sup>TCRβ<sup>+</sup>), SP4 (TCRβ<sup>+</sup>, CD4<sup>+</sup>) and SP8 (TCRβ<sup>+</sup>, CD8<sup>+</sup>).

Figure S2

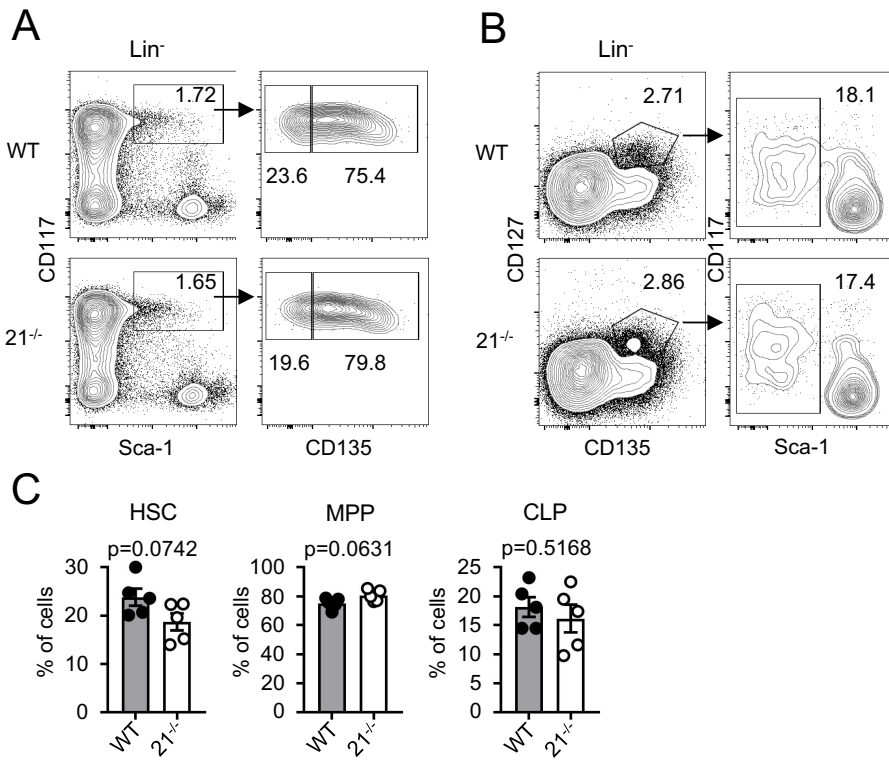

**Figure S2. Characterization of BM-derived T-lineage progenitors in miR-21-deficient mice.** **A)** Representative flow cytometric analysis of lineage-depleted BM from WT and miR-21<sup>-/-</sup> mice stained with antibodies against Sca-1, CD117 and CD135 to identify HSCs and MPPs. Numbers adjacent to gates represent frequencies relative to parent gate. **B)** Representative flow cytometric analysis of lineage-depleted BM from WT and miR-21<sup>-/-</sup> mice stained with antibodies against CD135, CD127, Sca-1 and CD117 to identify CLPs. Numbers adjacent to gates represent frequencies relative to parent gate. **C)** Statistical analysis of flow cytometric results shown in **A)** and **B)**. Each dot represents one mouse,  $n = 5$  per genotype.

Figure S3

A

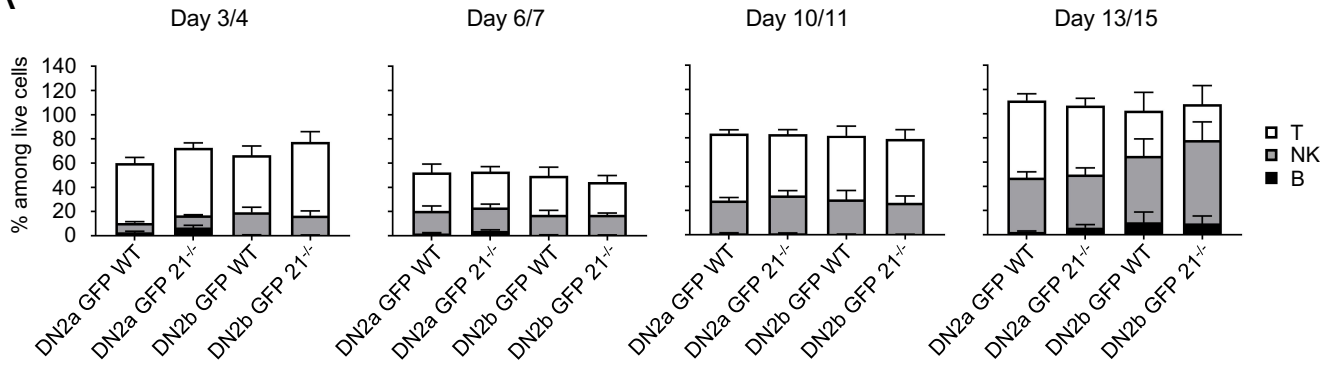

**Figure S3. Alternative lineage fate decisions are not promoted in the absence of miR-21.** A) Sorted DN2a and DN2b cells were cultured on OP9-GFP cells for up to 15 days. Generation of T, NK and B cells was assessed by flow cytometry at indicated periods of time. Bar graphs show pooled data from two independent experiment,  $n = 4-7$  mice per group.

Figure S4

A

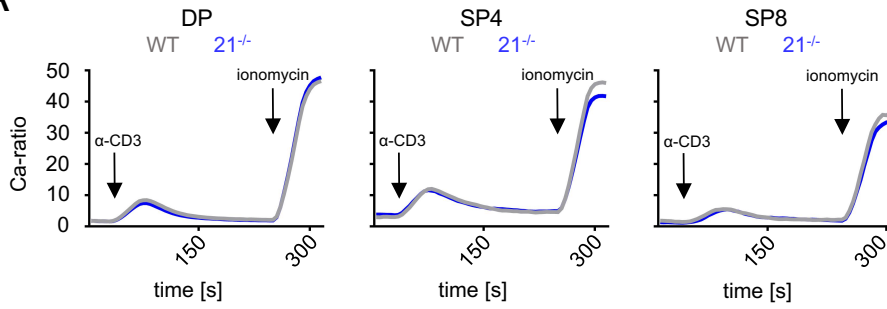

B

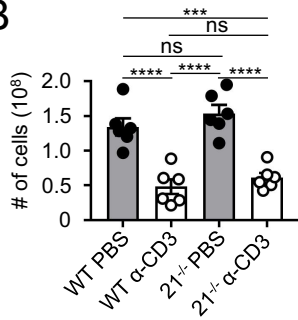

**Figure S4. Negative selection is not altered in the absence of miR-21.** A) Representative flow cytometric analysis of Ca-ratio over time of DP, SP4 and SP8 thymocytes stimulated with anti-CD3 and ionomycin as a control. B) Total cellularity of thymi from WT and miR-21<sup>-/-</sup> mice, 48 hours post injection with either PBS or  $\alpha$ -CD3, *n* = 6 for each genotype. Pooled data of two independent experiments.

Figure S5

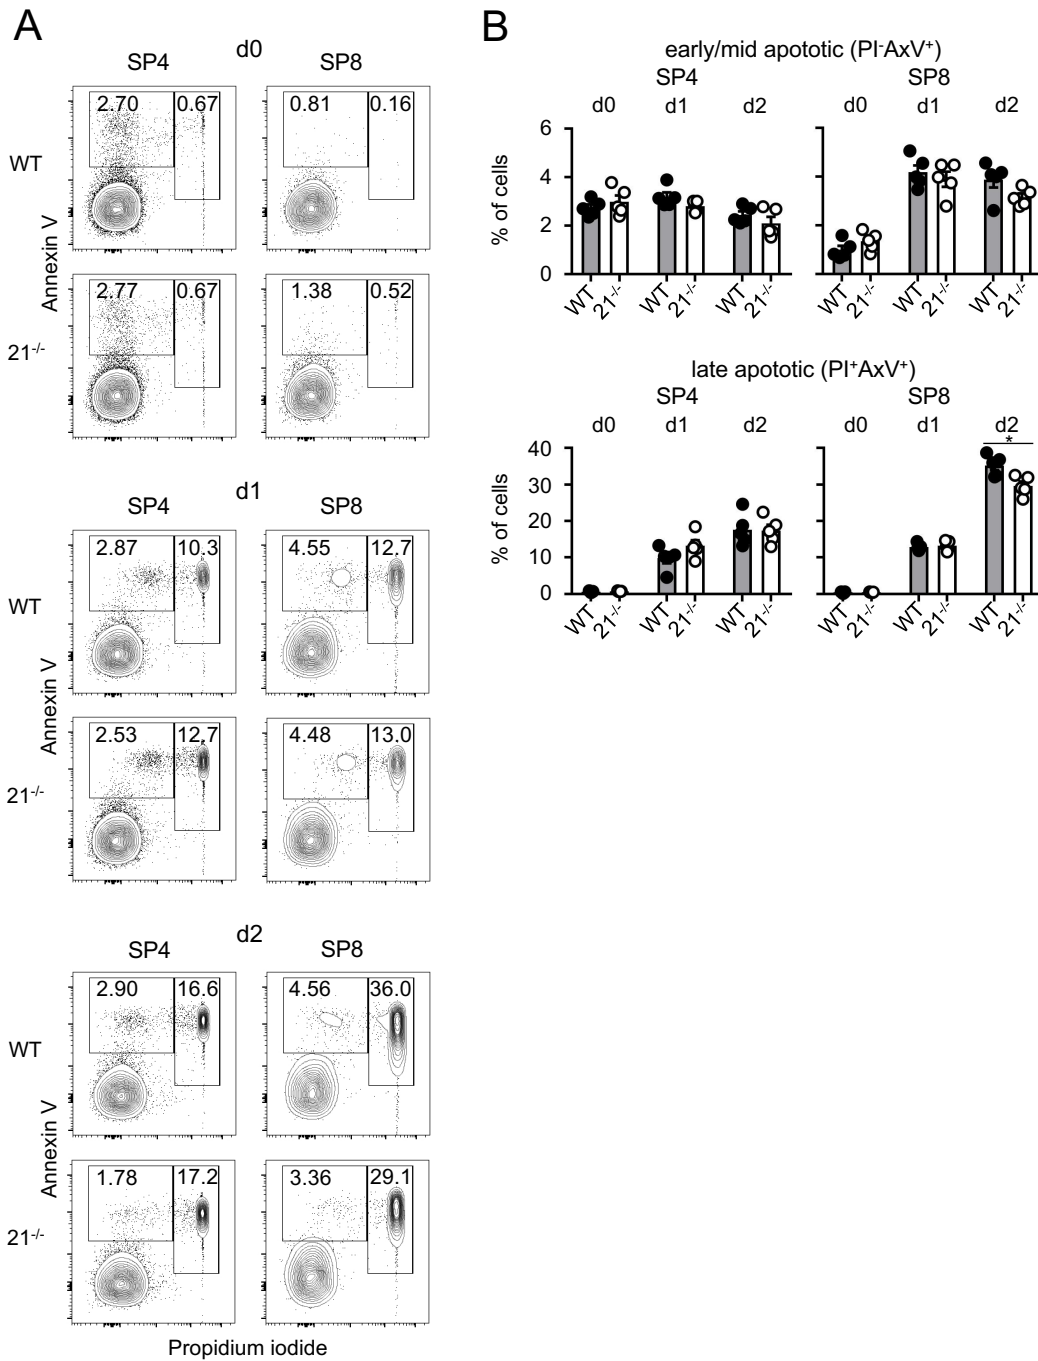

**Figure S5. Apoptosis of SP T cells *in vitro* is not disrupted in miR-21-deficient mice.** **A)** Representative flow cytometric analysis of thymi from WT and miR-21<sup>-/-</sup> mice stained with antibodies against CD4, CD8 as well as Propidium iodide (PI) and Annexin V (AxV). Numbers adjacent to gates represent frequencies of early/mid (defined as PI<sup>+</sup>AxV<sup>+</sup>) and late apoptotic cells (defined as PI<sup>+</sup>AxV<sup>+</sup>). Frequencies were determined at indicated days. **B)** Statistical analysis of flow cytometric results shown in **A)**. Each dot represents one mouse, *n* = 5 per genotype.
